# Supplementary material for: Optimizing Time Management for Drip-and-Ship Stroke Patients Qualifying for Endovascular Therapy—A Single-Network Study
Source: MDPI journal article supplement (doi:10.3390/healthcare10081519), 2022-08-12
Supplement: s1 [file s1]

Optimizing time management for drip-and-ship stroke patients qualifying for endovascular therapy - a single network experience.

**Supplemental Figure S1.** Flow chart of included patients. EVT: endovascular therapy, SOS-NET: local stroke network

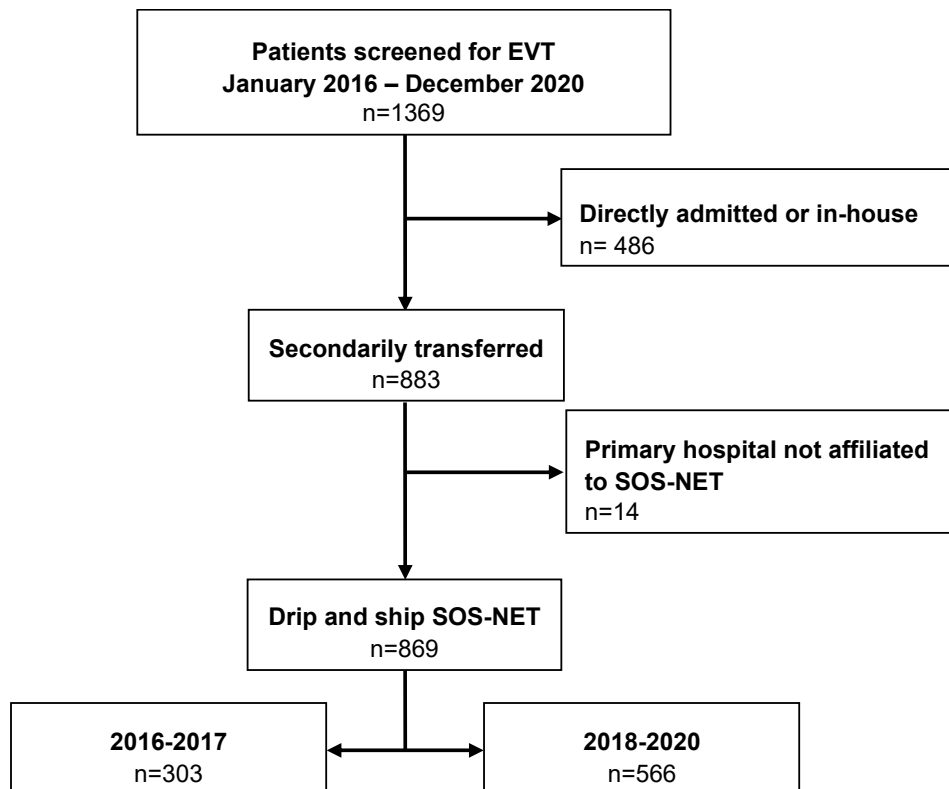

Optimizing time management for drip-and-ship stroke patients qualifying for endovascular therapy - a single network experience.

**Supplemental Table S1a.** Multiple linear regression for onset to EVT time.

Factors analyzed: admission period, age, sex, hospital, admission time, vascular circulation, intravenous thrombolysis, transfer mode and distance, anesthesia, NIHSS and ASPECTS at comprehensive stroke center admission.

| Model | Unstandardized Coefficients |            | Standardized Coefficients |        |        |       | 95,0% Confidence Interval for B |             | Correlations |         |        | Collinearity Statistics |       |
|-------|-----------------------------|------------|---------------------------|--------|--------|-------|---------------------------------|-------------|--------------|---------|--------|-------------------------|-------|
|       | B                           | Std. Error |                           | t      | Sig.   |       | Lower Bound                     | Upper Bound | Zero-order   | Partial | Part   | Tolerance               | VIF   |
| 5     | (Constant)                  | 280,713    | 8,576                     | 32,731 | 0,000  |       | 263,846                         | 297,581     |              |         |        |                         |       |
|       | admission time = on-call    | 41,136     | 7,201                     | 0,282  | 5,712  | 0,000 | 26,973                          | 55,298      | 0,276        | 0,291   | 0,277  | 0,966                   | 1,035 |
|       | distance = 11-30 km         | -32,619    | 7,523                     | -0,211 | -4,336 | 0,000 | -47,413                         | -17,824     | -0,203       | -0,225  | -0,210 | 0,989                   | 1,011 |
|       | period = 2018-2020          | -29,991    | 7,278                     | -0,203 | -4,121 | 0,000 | -44,305                         | -15,677     | -0,167       | -0,215  | -0,200 | 0,972                   | 1,029 |
|       | anesthesia = general        | 18,030     | 7,885                     | 0,113  | 2,286  | 0,023 | 2,521                           | 33,539      | 0,128        | 0,121   | 0,111  | 0,957                   | 1,045 |
|       | distance = ≤ 10 km          | -55,160    | 25,579                    | -0,106 | -2,156 | 0,032 | -105,468                        | -4,852      | -0,041       | -0,114  | -0,105 | 0,973                   | 1,028 |

a Dependent Variable: onset-EVT start

5

**Supplemental Table S1b.** Multiple linear regression for primary hospital phase.

Factors analyzed: admission period and time, age, sex, hospital, vascular circulation, intravenous thrombolysis, and transfer mode.

| Model | Unstandardized Coefficients     |            | Standardized Coefficients |        |        |       | 95,0% Confidence Interval for B |             | Correlations |         |        | Collinearity Statistics |       |
|-------|---------------------------------|------------|---------------------------|--------|--------|-------|---------------------------------|-------------|--------------|---------|--------|-------------------------|-------|
|       | B                               | Std. Error |                           | t      | Sig.   |       | Lower Bound                     | Upper Bound | Zero-order   | Partial | Part   | Tolerance               | VIF   |
| 4     | (Constant)                      | 128,694    | 6,605                     | 19,485 | 0,000  |       | 115,727                         | 141,661     |              |         |        |                         |       |
|       | vascular circulation = anterior | -46,068    | 6,160                     | -0,261 | -7,479 | 0,000 | -58,161                         | -33,975     | -0,255       | -0,267  | -0,261 | 0,998                   | 1,002 |
|       | IVT= no                         | 18,320     | 3,873                     | 0,166  | 4,730  | 0,000 | 10,716                          | 25,925      | 0,147        | 0,173   | 0,165  | 0,986                   | 1,014 |
|       | admission time=on-duty          | -15,361    | 3,874                     | -0,139 | -3,965 | 0,000 | -22,967                         | -7,755      | -0,120       | -0,145  | -0,138 | 0,983                   | 1,017 |
|       | primary hospital=PSC            | -8,723     | 3,802                     | -0,080 | -2,295 | 0,022 | -16,187                         | -1,260      | -0,069       | -0,085  | -0,080 | 0,991                   | 1,009 |

a. Dependent Variable: Primary Hospital

# Optimizing time management for drip-and-ship stroke patients qualifying for endovascular therapy - a single network experience.

## Supplemental Table S1c. Multiple linear regression for transfer phase.

Factors analyzed: admission period and time, age, sex, hospital, vascular circulation, intravenous thrombolysis,, transfer mode and distance.

| Model                            | Unstandardized Coefficients |            | Standardized Coefficients | t      | Sig.  | 95,0% Confidence Interval for B |             | Correlations |         |        | Collinearity Statistics |       |
|----------------------------------|-----------------------------|------------|---------------------------|--------|-------|---------------------------------|-------------|--------------|---------|--------|-------------------------|-------|
|                                  | B                           | Std. Error |                           |        |       | Lower Bound                     | Upper Bound | Zero-order   | Partial | Part   | Tolerance               | VIF   |
| 8                                |                             |            |                           |        |       |                                 |             |              |         |        |                         |       |
| (Constant)                       | 68,949                      | 2,381      |                           | 28,958 | 0,000 | 64,275                          | 73,622      |              |         |        |                         |       |
| distance= >100 km                | 31,060                      | 2,364      | 0,507                     | 13,139 | 0,000 | 26,420                          | 35,700      | 0,531        | 0,415   | 0,334  | 0,434                   | 2,306 |
| distance= 11-30 km               | -15,677                     | 2,061      | -0,287                    | -7,605 | 0,000 | -19,724                         | -11,631     | -0,472       | -0,255  | -0,193 | 0,452                   | 2,214 |
| distance= ≤10 km                 | -41,294                     | 5,020      | -0,220                    | -8,227 | 0,000 | -51,147                         | -31,441     | -0,230       | -0,274  | -0,209 | 0,898                   | 1,114 |
| distance= 71-100 km              | 18,691                      | 2,762      | 0,224                     | 6,768  | 0,000 | 13,271                          | 24,112      | 0,169        | 0,228   | 0,172  | 0,591                   | 1,692 |
| transfer mode= ambulance         | 6,029                       | 1,767      | 0,116                     | 3,412  | 0,001 | 2,561                           | 9,497       | -0,327       | 0,117   | 0,087  | 0,563                   | 1,777 |
| vascular circulation = posterior | 4,899                       | 2,040      | 0,061                     | 2,401  | 0,017 | 0,894                           | 8,904       | 0,087        | 0,083   | 0,061  | 0,994                   | 1,006 |
| distance= 51-70 km               | 5,001                       | 2,399      | 0,074                     | 2,084  | 0,037 | 0,291                           | 9,710       | -0,011       | 0,072   | 0,053  | 0,509                   | 1,966 |
| period= 2018-2020                | -2,717                      | 1,381      | -0,050                    | -1,967 | 0,050 | -5,429                          | -0,006      | -0,066       | -0,068  | -0,050 | 0,981                   | 1,019 |

a. Dependent Variable: Transfer

Optimizing time management for drip-and-ship stroke patients qualifying for endovascular therapy - a single network experience.

**Supplemental Table S2.** Transfer times according to distance and mode.

| Distance, km (n) | Phase                         | Ambulance<br>n=518, median (IQR) | Helicopter<br>n=351, median (IQR) | P-value      |
|------------------|-------------------------------|----------------------------------|-----------------------------------|--------------|
| ≤ 10             | Transfer phase (min)          | 35 (26-39)                       | -                                 |              |
|                  | Request – Departure PH (min)  | 22 (16-26)                       | -                                 |              |
|                  | Departure PH – Door CSC (min) | 13 (8-15)                        | -                                 |              |
| 11-30            | Transfer phase (min)          | 57 (49-63)                       | 71 (64-98)                        | <b>0.004</b> |
|                  | Request – Departure PH (min)  | 27 (21-33)                       | 46 (32-58)                        | <b>0.001</b> |
|                  | Departure PH – Door CSC (min) | 29 (24-33)                       | 33 (23-38)                        | 0.378        |
| 31-50            | Transfer phase (min)          | 67 (63-77)                       | 76 (69-88)                        | <b>0.004</b> |
|                  | Request – Departure PH (min)  | 27 (22-31)                       | 51 (42-61)                        | <b>0.000</b> |
|                  | Departure PH – Door CSC (min) | 40 (36-46)                       | 22 (19-28)                        | <b>0.000</b> |
| 51-70            | Transfer phase (min)          | 71 (64-84)                       | 72 (60-84)                        | 0.471        |
|                  | Request – Departure PH (min)  | 28 (23-36)                       | 41 (32-55)                        | <b>0.000</b> |
|                  | Departure PH – Door CSC (min) | 44 (38-51)                       | 29 (26-33)                        | <b>0.000</b> |
| 71-100           | Transfer phase (min)          | 92 (85-107)                      | 80 (67-94)                        | <b>0.001</b> |
|                  | Request – Departure PH (min)  | 28 (18-47)                       | 47 (35-60)                        | <b>0.000</b> |
|                  | Departure PH – Door CSC (min) | 65 (61-71)                       | 32 (27-39)                        | <b>0.000</b> |
| > 100            | Transfer phase (min)          | 114 (103-126)                    | 94 (81-106)                       | <b>0.000</b> |
|                  | Request – Departure PH (min)  | 37 (31-55)                       | 51 (40-63)                        | <b>0.000</b> |
|                  | Departure PH – Door CSC (min) | 79 (68-91)                       | 39 (35-46)                        | <b>0.000</b> |

PH: primary hospital, CSC: comprehensive stroke center
